# Supplementary material
Source: PubMed Central journal article supplement (PMC3142916)
Supplement: NIHMS79898-supplement-1.pdf [file NIHMS79898-supplement-1.pdf]

## Supplementary Material for

### Rapid evolution of protein kinase PKR alters sensitivity to viral inhibitors

Stefan Rothenburg<sup>1</sup>, Eun Joo Seo<sup>1</sup>, James S. Gibbs<sup>2</sup>, Thomas E. Dever<sup>1</sup> and Katharina Dittmar<sup>3</sup>

Address: <sup>1</sup>Laboratory of Gene Regulation and Development, *Eunice Kennedy Shriver* National Institute of Child Health and Human Development, National Institutes of Health, Bethesda, MD 20892, USA, <sup>2</sup>Laboratory of Viral Diseases, National Institutes of Allergy and Infectious Diseases, National Institutes of Health, Bethesda, MD 20892, USA, <sup>3</sup>Department of Biological Sciences, State University of New York at Buffalo, Buffalo, NY 14260, USA

Correspondence should be addressed to S.R. (rothenst@mail.nih.gov)

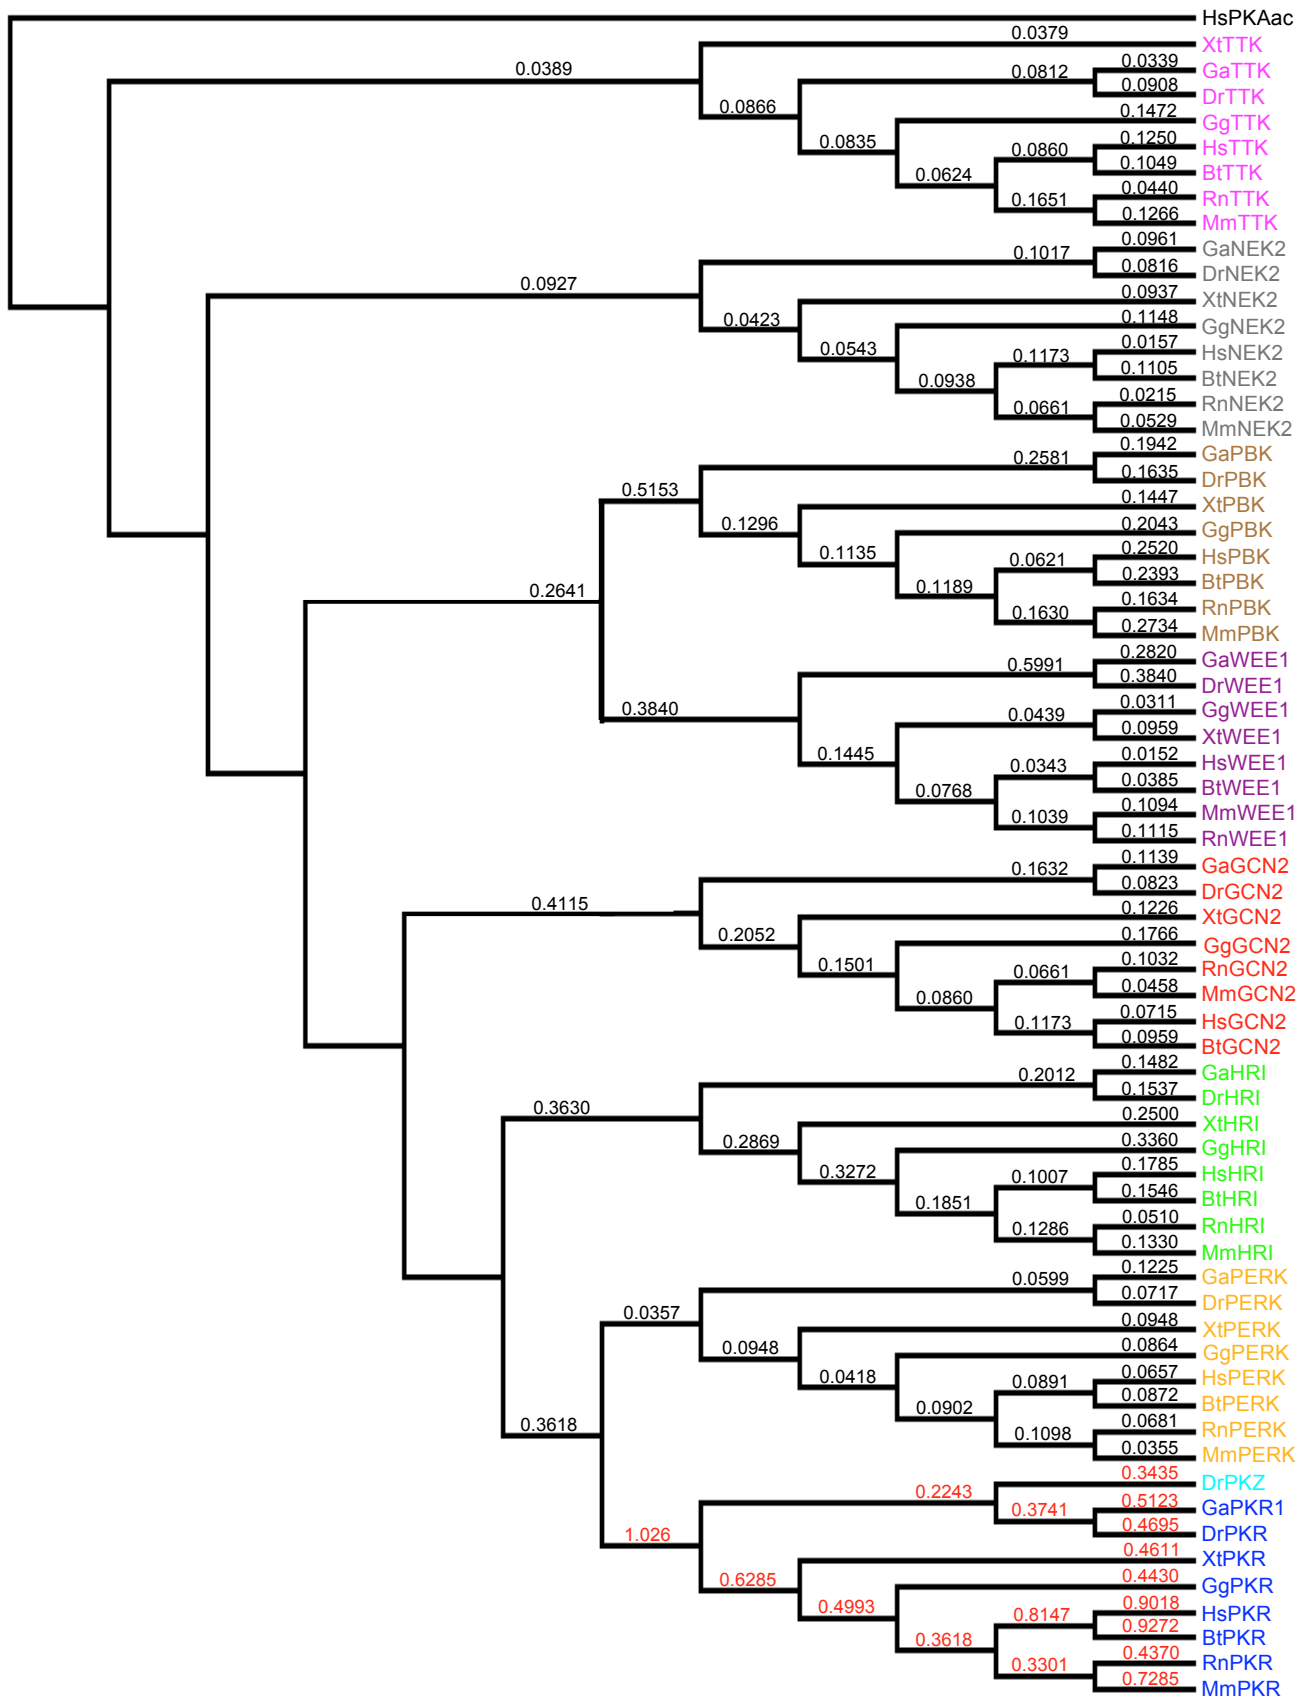

**Supplementary Figure 1. Maximum Likelihood topology of the eIF2 $\alpha$ - and other kinase domains.**

Maximum Likelihood topology of the eIF2 $\alpha$ - and other kinase domains (color-coded as in Fig. 1) from human (*Homo sapiens*, Hs), cattle (*Bos taurus*, Bt), mouse (*Mus musculus*, Mm), rat (*Rattus norvegicus*, Rn), chicken (*Gallus gallus*, Gg), frog (*Xenopus tropicalis*, Xt), stickleback fish (*Gasterosteus aculeatus*, Ga) and zebrafish (*Danio rerio*, Dr). HsPKAac is the outgroup. Numbers above branches denote ratios of non-synonymous to synonymous ( $dN/dS$ ) changes.

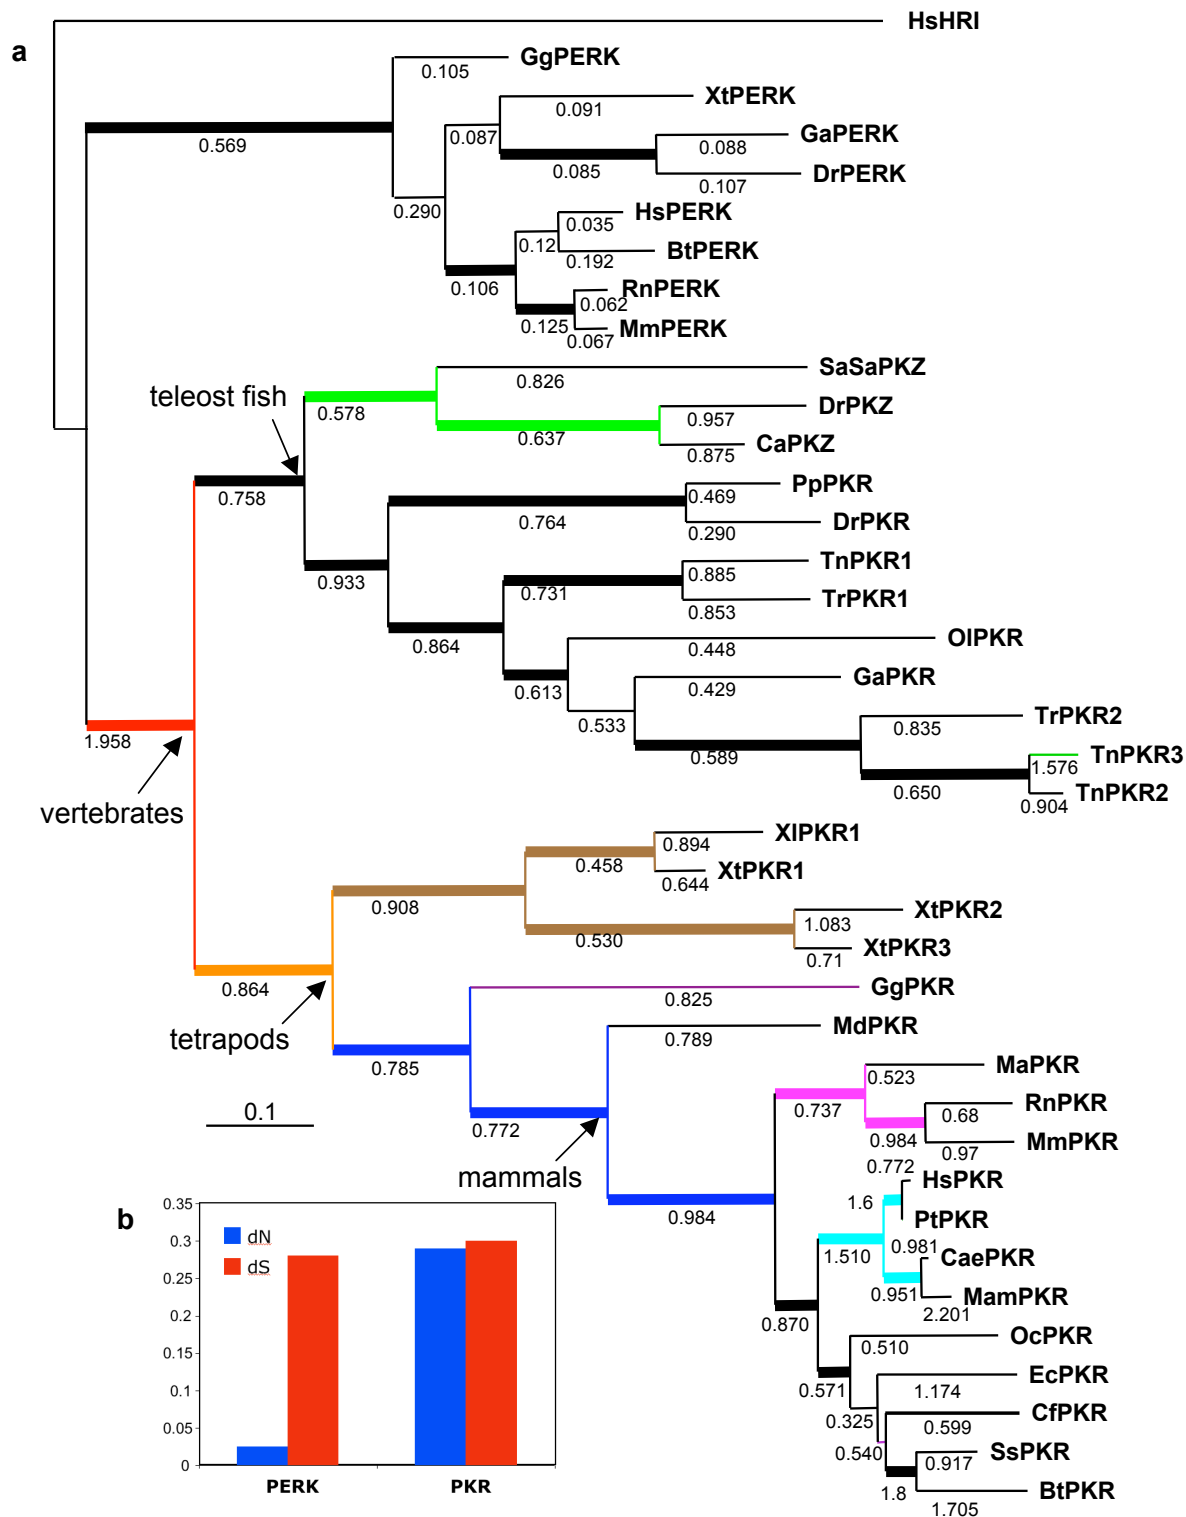

**Supplementary Figure 2. Maximum Likelihood topology of the PKR/PKZ family.**

(a) HsHRI was used as the outgroup. Numbers below the branches denote  $dN/dS$  ratios. Branches in which positively selected residues have been detected are colored. Color-coding corresponds to residues in Figure 1c, Supplementary Table 2. Thick branches show bootstrap support values of  $> 75$ ;  $[-\ln L=20189.1]$ . The following abbreviations were used: Bt, *Bos taurus* (cattle); Ss, *Sus scrofa* (pig); Cf, *Canis familiaris* (dog); Oc, *Oryctolagus cuniculus* (European rabbit); Ec, *Equus caballus* (horse); Mam, *Macaca mulatta* (Rhesus macaque); C, *Chlorocebus aethiops* (African green monkey); Pt, *Pan troglodytes* (chimpanzee); Hs, *Homo sapiens* (human); *Mus musculus* (house mouse); Rn, *Rattus norvegicus* (Norway rat); Ma, *Mesocricetus auratus* (golden hamster); *Monodelphis domestica* (gray short-tailed opossum); Gg, *Gallus gallus* (chicken); Xt, *Xenopus tropicalis* (western clawed frog); XI, *Xenopus laevis* (African clawed frog); Tn, *Tetraodon nigroviridis* (green spotted pufferfish); *Takifugu rubripes* (torafugu); Ga, *Gasterosteus aculeatus* (three spined stickleback); Ol, *Oryzias latipes* (Japanese medaka); Dr, *Danio rerio* (zebrafish); Pp, *Pimephales promelas* (fathead minnow); Ca, *Carassius auratus* (goldfish); Ssa, *Salmo salar* (Atlantic salmon) (b) Column graph of average values of dS (red), and dN (blue) in the sister group of PERK and PKR kinases. PKR kinases show a significant increase in dN values.

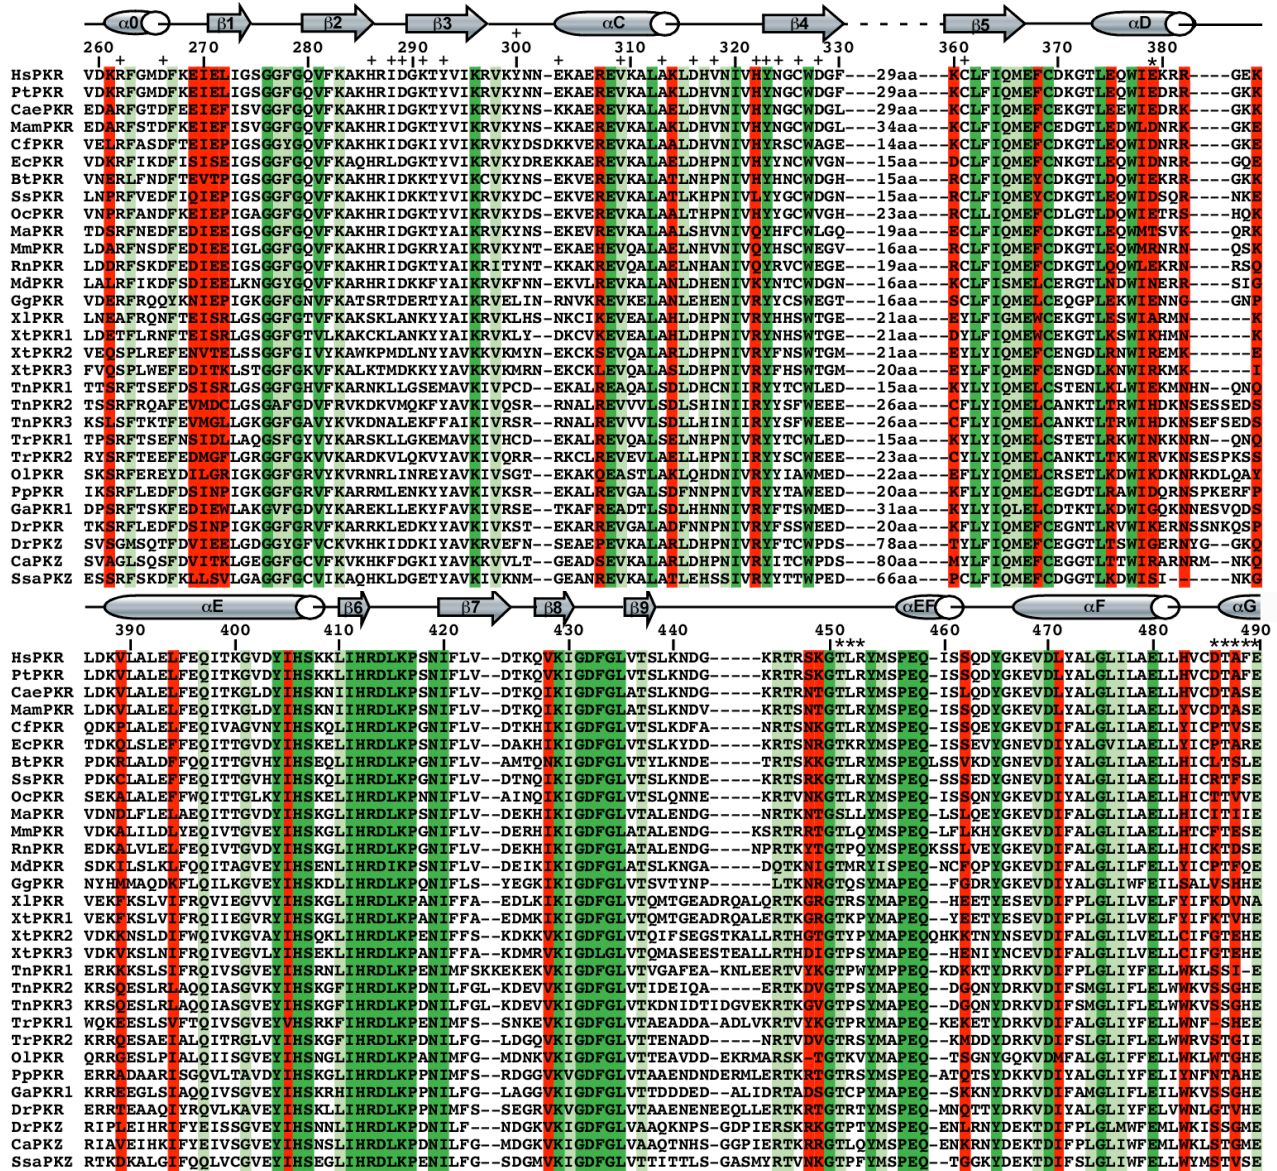

**Supplementary Figure 3. Multiple sequence alignment of the kinase domains of PKR and PKZ and positively selected sites.**

Multiple sequence alignment of the kinase domains of PKR and PKZ from the indicated species (abbreviations are explained in the legend of **Supplementary Fig. 2**). Secondary structure elements as well as numbering of residues relative to human PKR are shown above the sequences. Residues involved in PKR inter-dimer contacts (pluses) and eIF2 $\alpha$  recognition (asterisks) are marked above the sequences. Background of residues at positively selected site is colored red. Background of residues that are highly conserved is colored as follows: 100% conservation = dark green;  $\geq 90\%$  conservation = light green.



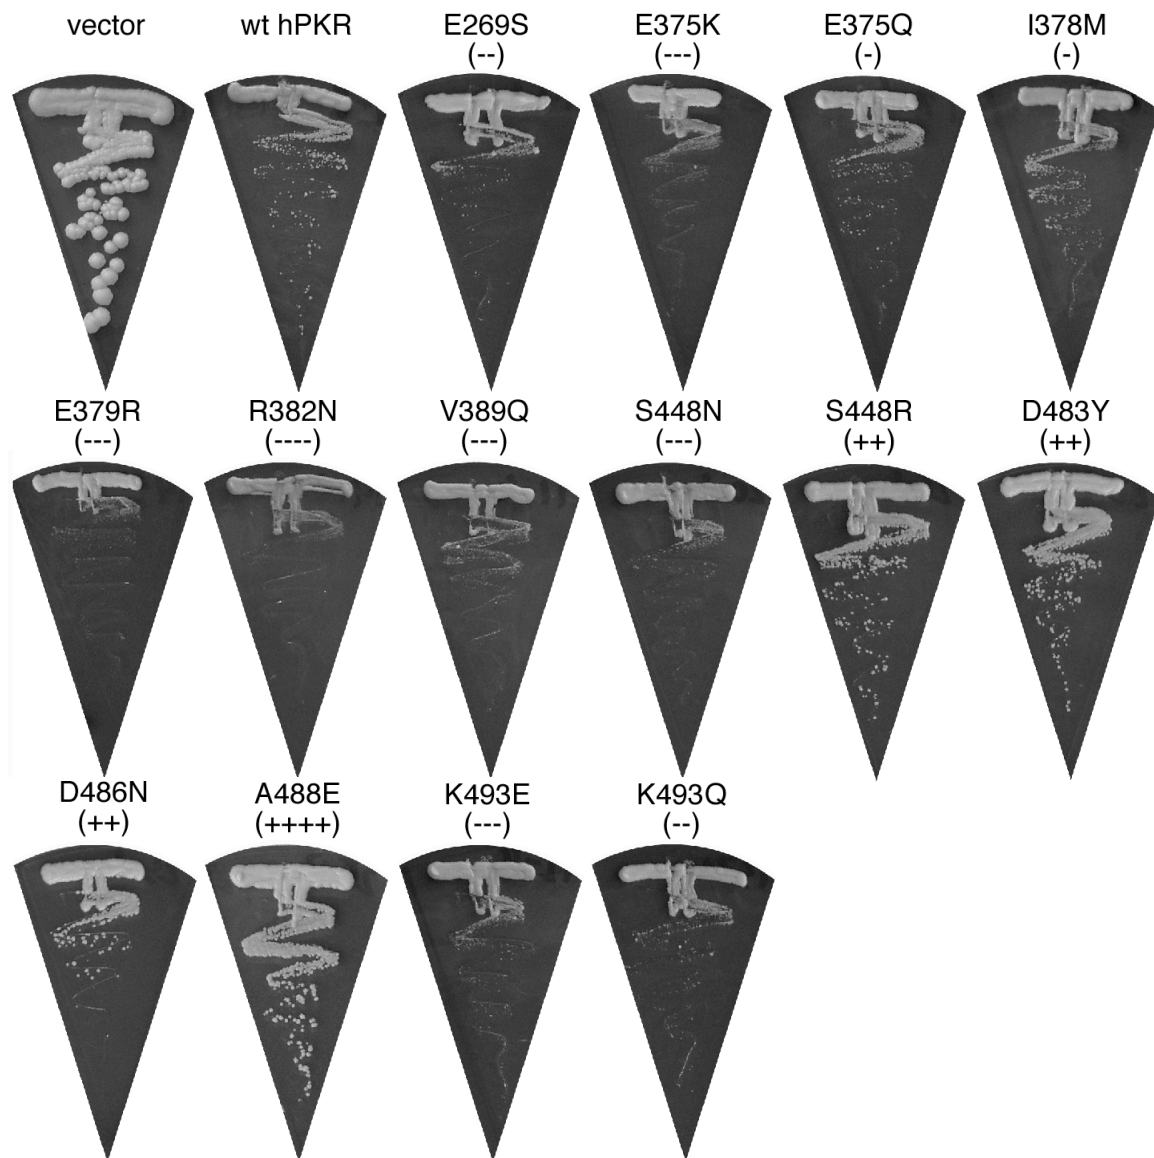

**Supplementary Figure 4. Sensitivity of human PKR and PKR mutants to variola virus C3L.**

Plasmids expressing WT or the indicated PKR mutants under the control of a galactose-inducible promoter were introduced into a yeast strain expressing varC3L, the homolog of vacK3L. Transformants were streaked on galactose medium and incubated 4 days at 30°C. Mutants that exhibited altered sensitivity to C3L as compared with WT PKR are shown. Growth of colonies was evaluated and is indicated: (-) to (----) for poor growth of yeast relative to transformants expressing WT PKR indicating weak to strong resistance to C3L, and (+) to (+++++) for better growth than yeast expressing WT PKR indicating weakly to strongly increased sensitivity to C3L.

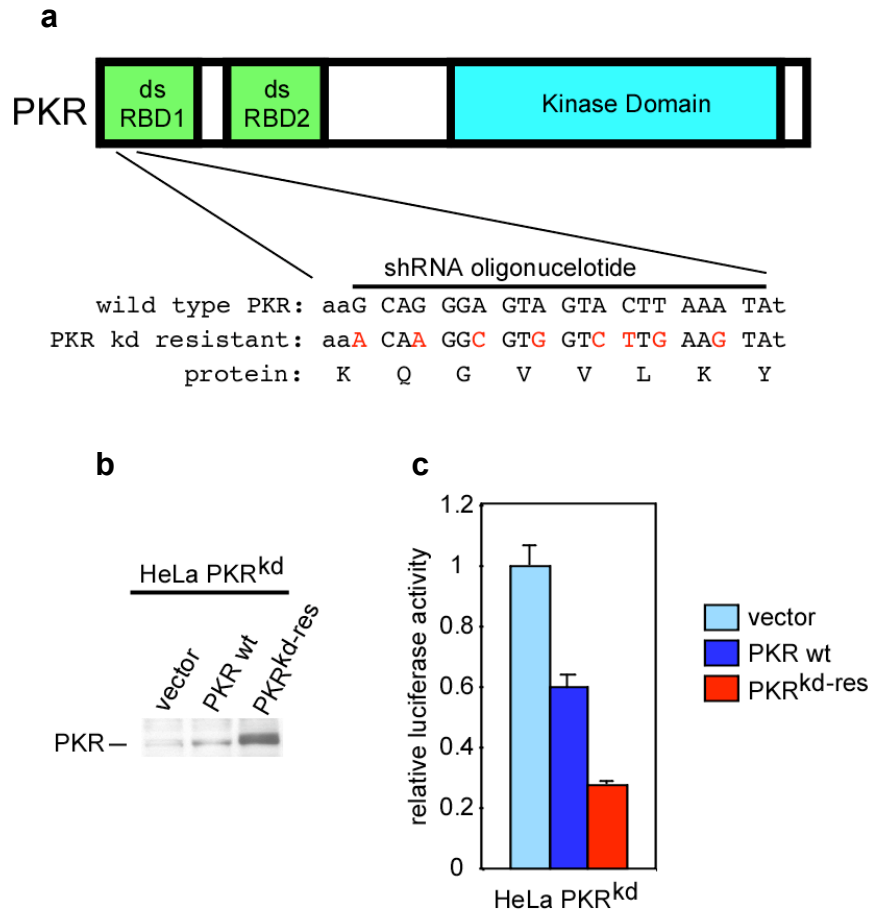

**Supplementary Figure 5. Construction of knock-down resistant PKR**

(a) Schematic representation of the PKR domain organization (dsRBD = double-stranded RNA binding domains). The relative position of the target sequence for the shRNA is indicated. Synonymous sites in the shRNA target sequence were mutated (shown in red) to obtain knock-down (kd) resistant PKR (PKR<sup>kd-res</sup>). (b) Immunoblot analysis of PKR expression in HeLa PKR<sup>kd</sup> cells. Cells were transfected with vector, wild type hPKR or hPKR<sup>kd-res</sup>. (c) HeLa PKR<sup>kd</sup> cells were cotransfected with a luciferase reporter vector and vector, wild type hPKR or hPKR<sup>kd-res</sup>. Relative luciferase activity, normalized to the vector transfection, is shown. Standard deviations are indicated for three independent transfections.

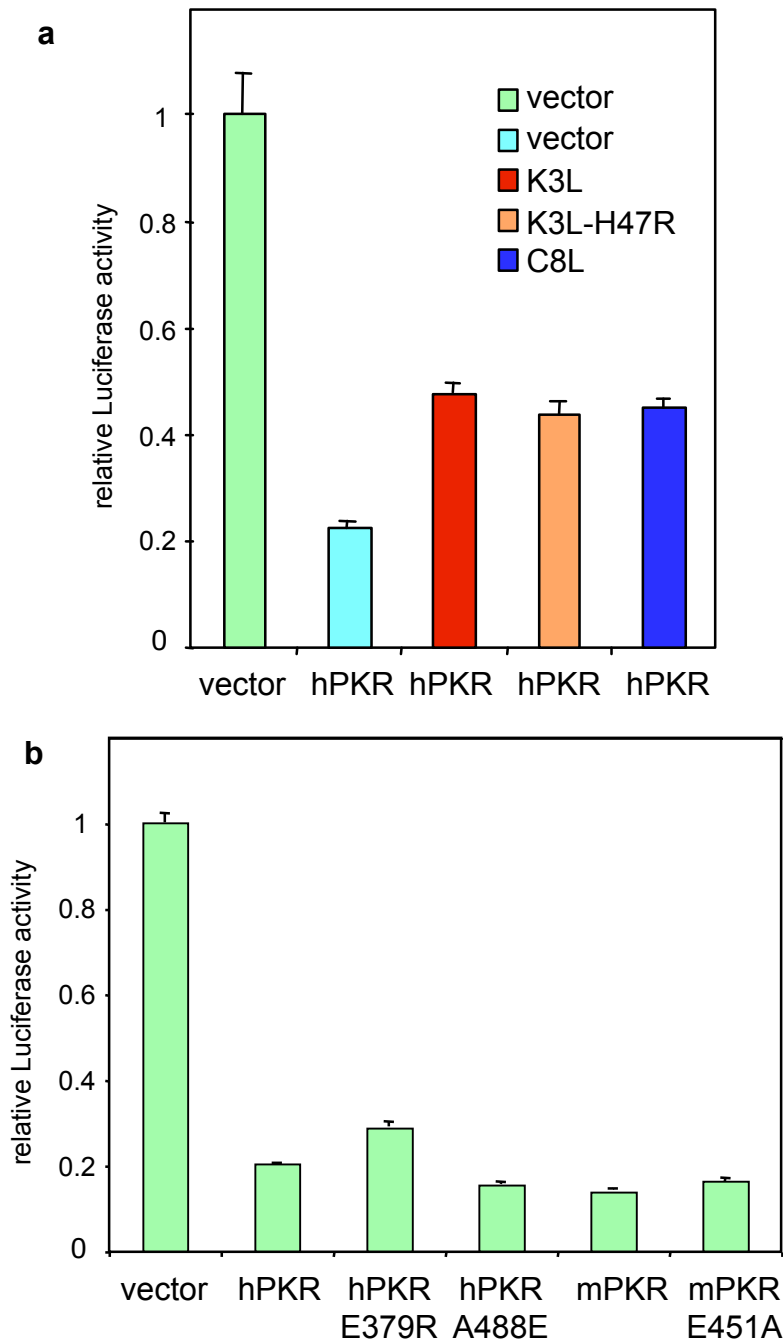

**Supplementary Figure 6. Inhibition of luciferase by PKR**

(a) HeLa PKR<sup>kd</sup> cells were cotransfected with a luciferase reporter, human hPKR<sup>kd-res</sup> and the indicated K3L orthologs: vack3L, vack3L-H47R and swinepox C8L. Luciferase activity was normalized to vector (control) transfections. Standard deviations are indicated for three independent transfections. (b) HeLa PKR<sup>kd</sup> cells were cotransfected with a luciferase reporter and vector, knock-down resistant derivatives of hPKR, hPKR-E379R, hPKR-A488E, mPKR or mPKR-E451A.

|      | PKR       | PERK *    | HRI*      | GCN2*     | Wee1*     | PBK*      | Nek2*      | TTK*      |
|------|-----------|-----------|-----------|-----------|-----------|-----------|------------|-----------|
| Hs   | 0.28808   | 0.02985   | 0.1312    | 0.03646   | 0.0945    | 0.1241    | 0.06743    | 0.0779    |
| Bt   | 0.29472   | 0.03953   | 0.1226    | 0.03645   | 0.0937    | 0.1245    | 0.06771    | 0.0975    |
| Rn   | 0.27931   | 0.03645   | 0.1289    | 0.02906   | 0.101     | 0.1363    | 0.064074   | 0.1166    |
| Mm   | 0.2792    | 0.03745   | 0.1311    | 0.03643   | 0.08075   | 0.1357    | 0.06408    | 0.1264    |
| Gg   | 0.32966   | 0.04008   | 0.1322    | 0.03736   | 0.09197   | 0.149     | 0.06281    | 0.08191   |
| Dr   | 0.2599    | 0.04771   | 0.1226    | 0.05293   | 0.10182   | 0.1462    | 0.04869    | 0.147     |
| Ga   | 0.3299    | 0.05002   | 0.1572    | 0.04922   | 0.08588   | 0.1177    | 0.04897    | 0.1405    |
| Xt   | 0.27894   | 0.05569   | 0.1643    | 0.04505   | 0.08987   | 0.1212    | 0.0643     | 0.112     |
| Mean | 0.2924637 | 0.0420975 | 0.1362625 | 0.04037   | 0.0924363 | 0.1318375 | 0.061008   | 0.1124763 |
| SD   | 0.0250758 | 0.0083937 | 0.0156789 | 0.0079384 | 0.0071074 | 0.0117254 | 0.00770647 | 0.0254739 |
| SEM  | 0.0088656 | 0.0029676 | 0.0055433 | 0.0028067 | 0.0025128 | 0.0041456 | 0.00272465 | 0.0090064 |

**Supplementary Table 1. Relative branch lengths from the Maximum Likelihood topology of eIF2 $\alpha$ - and other kinases from 8 vertebrate species.** The branch lengths from the phylogram depicted in **Figure 1a** of PKR, PERK, HRI, GCN2, WEE1, PBK, NEK2 and TTK from human (*Homo sapiens*, Hs), cattle (*Bos taurus*, Bt), mouse (*Mus musculus*, Mm), rat (*Rattus norvegicus*, Rn), chicken (*Gallus gallus*, Gg), frog (*Xenopus tropicalis*, Xt), stickleback fish (*Gasterosteus aculeatus*, Ga) and zebrafish (*Danio rerio*, Dr) are presented, and were used to construct the graph in Figure 1b. Asterisks denote significant difference from PKR ( $P < 0.001$ ).



| branch                | lobe | Sublocation¶                    | Residue¶¶               | TreeSAAP | PAML (BEB) | REL (HyPHY) | tertiary windowing |
|-----------------------|------|---------------------------------|-------------------------|----------|------------|-------------|--------------------|
| <b>Vertebrates</b>    |      |                                 |                         |          |            |             |                    |
|                       | N    | $\alpha 0$                      | <b>K261<sup>a</sup></b> | ***      | ***        | †           | yes (261+262)      |
|                       | C    | $\alpha D$                      | <b>E375</b>             | *        | **         | †           | yes (374-376)      |
|                       | C    | $\alpha E$                      | <b>V389</b>             | *        | ***        | †           | yes (389-390)      |
|                       | C    | $\alpha E$                      | <b>I405</b>             | ***      | *          | †           | yes (405+406)      |
|                       | C    | P+1 loop                        | <b>K449</b>             | ***      | *          | †           | yes (447-449)      |
|                       | C    | loop ( $\alpha F - \alpha G$ )  | <b>D486</b>             | ***      | *          | ††          | yes (483-490)      |
|                       | C    | $\alpha G$                      | <b>A488</b>             | ***      | *          | ††          | yes (483-490)      |
| <b>Tetrapods</b>      |      |                                 |                         |          |            |             |                    |
|                       | N    | loop ( $\alpha 0 - \beta 1$ )   | <b>I270</b>             | ***      | *          | †           | yes (269-272)      |
|                       | C    | $\beta 1$                       | <b>L272<sup>b</sup></b> | ***      | ***        | †           | yes (269-272)      |
|                       | C    | loop ( $\beta 5 - \alpha D$ )   | <b>F368</b>             | **       | *          | †           | yes (367-369)      |
|                       | C    | $\alpha G$                      | <b>K493</b>             | *        | ***        | †           | yes (491-493)      |
|                       | C    | loop ( $\alpha G - \alpha H$ )  | <b>D505</b>             | ***      | *          | †           | yes (500-506)      |
|                       | C    | loop ( $\alpha H - \alpha I$ )  | <b>S520</b>             | ***      | *          | †           | yes (518-522)      |
| <b>Mammals + Bird</b> |      |                                 |                         |          |            |             |                    |
|                       | C    | $\beta 1$                       | <b>L272<sup>b</sup></b> | ***      | *          | †           | yes (469-472)      |
|                       | C    | $\alpha D$                      | <b>R382</b>             | *        | **         | †           | yes (382)          |
|                       | C    | $\beta 8$                       | <b>V428</b>             | ***      | ***        | †           | yes (427-429)      |
| <b>Mammals</b>        |      |                                 |                         |          |            |             |                    |
|                       | N/C  | loop ( $\alpha C - \beta 4$ )   | <b>H322</b>             | *        | *          | †           | yes (322)          |
|                       | C    | $\alpha E$                      | <b>L394</b>             | ***      | ***        | †           | no                 |
|                       | C    | loop ( $\alpha EF - \alpha F$ ) | <b>S462<sup>e</sup></b> | ***      | *          | ††          | yes (460-462)      |
|                       | C    | $\alpha G$                      | <b>T491</b>             | *        | *          | †           | yes (491-493)      |
|                       | C    | $\alpha G$                      | <b>D500</b>             | ***      | *          | †           | yes (500-506)      |
|                       | C    | $\alpha G$                      | <b>S504</b>             | **       | ***        | †           | yes (500-506)      |
|                       | C    | $\alpha H$                      | <b>L514</b>             | ***      | *          | †           | yes (513-515)      |
| <b>Primates</b>       |      |                                 |                         |          |            |             |                    |
|                       | N    | $\alpha 0$                      | <b>K261<sup>a</sup></b> | ***      | ***        | ††          | yes (261+262)      |
|                       | N    | $\alpha C$                      | <b>K314</b>             | **       | ***        | †           | yes (314)          |
|                       | C    | loop ( $\alpha D - \alpha E$ )  | <b>K385<sup>d</sup></b> | ***      | ***        | ††          | yes (385-387)      |
|                       | C    | P+1 loop                        | <b>S448</b>             | **       | *          | †           | yes (447-449)      |
|                       | C    | $\alpha H$                      | <b>L471</b>             | ***      | *          | †           | yes (469-472)      |
|                       | C    | loop ( $\alpha F - \alpha G$ )  | <b>H483</b>             | ***      | ***        | ††          | yes (483-490)      |
| <b>Rodents</b>        |      |                                 |                         |          |            |             |                    |
|                       | C    | $\alpha D$                      | <b>I378</b>             | ***      | *          | †           | yes (378-381)      |
|                       | C    | $\alpha D$                      | <b>E379</b>             | ***      | *          | ††          | yes (378-381)      |
|                       | C    | loop ( $\alpha EF - \alpha F$ ) | <b>S462<sup>e</sup></b> | n.s.     | *          | ††          | yes (460-462)      |
| <b>Chicken</b>        |      |                                 |                         |          |            |             |                    |
|                       | C    | loop ( $\alpha D - \alpha E$ )  | <b>K385<sup>d</sup></b> | ***      | ***        | †           | yes (385-387)      |
|                       | C    | loop ( $\alpha G - \alpha H$ )  | <b>I502</b>             | ***      | *          | †           | yes (500-506)      |
| <b>Xenopus clade</b>  |      |                                 |                         |          |            |             |                    |
|                       | C    | $\beta 5$                       | <b>K360<sup>c</sup></b> | n.s.     | ***        | ††          | no                 |
|                       | C    | loop ( $\alpha D - \alpha E$ )  | <b>K385<sup>d</sup></b> | ***      | *          | ††          | yes (385-387)      |
|                       | C    | loop ( $\alpha EF - \alpha F$ ) | <b>S462<sup>e</sup></b> | n.s.     | *          | ††          | yes (460-462)      |
|                       | C    | $\alpha I$                      | <b>E524</b>             | *        | ***        | †           | yes (523-524)      |
| <b>TnPKR3</b>         |      |                                 |                         |          |            |             |                    |
|                       | N    | $\alpha 0$                      | <b>K261<sup>a</sup></b> | ***      | ***        | ††          | yes (261+262)      |
| <b>PKZ</b>            |      |                                 |                         |          |            |             |                    |
|                       | N    | loop ( $\alpha 0 - \beta 1$ )   | <b>E269</b>             | ***      | *          | †           | yes (269-272)      |
|                       | N    | $\beta 1$                       | <b>E271</b>             | ***      | *          | †           | yes (269-272)      |
|                       | N    | $\alpha C$                      | <b>R307</b>             | ***      | *          | †           | yes (306-310)      |
|                       | C    | $\beta 5$                       | <b>K360<sup>c</sup></b> | ***      | *          | ††          | no                 |

## Supplementary Table 2. Residues in the PKR kinase domain under positive selection during evolution.

Residues were identified as under positive selection using the programs TreeSAAP, PAML, REL and tertiary windowing, as indicated. Residues are grouped according to when they were under positive selection; color-coding of the lineages corresponds to Figure 1c,d and Supplementary figure 2. Lobe refers to residues located in the N-terminal (N) and C-terminal (C) lobes of the kinase domain. ¶Sublocations are annotated as in Dar et al. (2005). ¶¶Residues and positions of positively selected residues are shown for human PKR. <sup>a</sup>Residue 261 was positively selected in vertebrate, primate and tetraodon (TnPKR3) lineages, selection in vertebrates is highlighted in Fig. 1. <sup>b</sup>Residue 272 was positively selected in both tetrapods and mammals + bird, selection in tetrapods is highlighted in Fig. 1. <sup>c</sup>Residue 360 was positively selected in PKZ and Xenopus, selection in PKZ is highlighted in Fig. 1. <sup>d</sup>Residue 385 was positively selected in primates, chicken and Xenopus, selection in primates is highlighted in Fig. 1. <sup>e</sup>Residue 462 was positively selected in mammals, rodents and Xenopus, selection in mammals is highlighted in Fig. 1. Asterisks in TreeSAAP and PAML columns denote level of statistical significance [\*\*\* =  $p < 0.001$ ; \*\* =  $p < 0.01$ ; \* =  $p < 0.05$ ; n.s. = not significant ( $p > 0.05$ )]. Crosses in the REL column describe sites detected at Bayes Factor 50 (††), and 10 (†) respectively. Tertiary windowing shows the range of adjacent residues under significant positive selection (yes) for a 10 Å window within the protein structure.

| Species                         | Genus          | K3L ortholog name (accession #) | E3L ortholog name (accession #) |
|---------------------------------|----------------|---------------------------------|---------------------------------|
| Vaccinia virus                  | Orthopoxvirus  | K3L (M35027)                    | E3L (AAA48040)                  |
| Variola virus                   | Orthopoxvirus  | C3L (L22579)                    | E3L (L22579)                    |
| Camelpox virus                  | Orthopoxvirus  | CMLV032 (AF438165)              | CMLV055 (AF438165)              |
| Cowpox virus                    | Orthopoxvirus  | M3L (X94355)                    | F3L (X94355)                    |
| Rabbitpox virus                 | Orthopoxvirus  | RPXV026 (AY484669)              | RPXV048 (AY484669)              |
| Horsepox virus                  | Orthopoxvirus  | HSPV037 (DQ792504)              | HSPV060 (DQ792504)              |
| Taterapox virus                 | Orthopoxvirus  | 037 (NC_008291)                 | 060 (NC_008291)                 |
| Cantagalo orthopoxvirus         | Orthopoxvirus  | eIF2a-like (AY772447)           | E3L (AY771338)                  |
| Ectromelia virus                | Orthopoxvirus  | eIF-2 alpha* (AJ312291)         | dsRBD (AJ312294)                |
| Monkeypox virus                 | Orthopoxvirus  | K3L* (AF380138)                 | MPXVgp052** (AF380138)          |
| Lumpy skin disease virus        | Carpipoxvirus  | LSDV014 (NC_003027)             | LSDV034 (NC_003027)             |
| Goatpox virus                   | Carpipoxvirus  | K3L homolog (AY077835)          | E3L homolog (AY077835)          |
| Sheeppox virus                  | Carpipoxvirus  | SPPV_11 (NC_004002)             | SPPV_30 (NC_004002)             |
| Myxoma virus                    | Leporipoxvirus | M156R (NC_001132)               | M29L** (NC_001132)              |
| Rabbit fibroma virus            | Leporipoxvirus | gp008.2L (NC_001266)            | gp029L** (NC_001266)            |
| Yaba monkey tumor virus         | Yatapoxvirus   | 12L (NC_005179)                 | 34L (NC_005179)                 |
| Yaba-like disease virus         | Yatapoxvirus   | 12L (NC_002642)                 | 34L (NC_002642)                 |
| Tanapox virus                   | Yatapoxvirus   | 12L (NC_009888)                 | 34L (NC_009888)                 |
| Swinepox virus                  | Suipoxvirus    | SPV010 (C8L) (NC_003389)        | SPV032 (NC_003389)              |
| Deerpox virus                   | unclassified   | DpV84gp020 (AY689437)           | DpV84gp042 (AY689437)           |
| Bovine papular stomatitis virus | Parapoxvirus   | absent                          | ORF020 (NC_005337)              |
| Orf virus                       | Parapoxvirus   | absent                          | OV20.0L (AY424975)              |
| Tillquist parapoxvirus          | Parapoxvirus   | absent                          | dsRBD (AY278212)                |

**Supplementary Table 3. Poxviruses with orthologs of Vaccinia virus K3L and E3L proteins.**

\* C-terminal truncation, most likely not functional. \*\* N-terminal truncation

| Residue | found in species                                                 | Sublocation                      | Mutation | found in species                       | Vaccinia v.<br>K3L-H47R | Variola v.<br>C3L | Variola v.<br>E3L | eIF2 $\alpha$ S51A | eIF2B mut. |
|---------|------------------------------------------------------------------|----------------------------------|----------|----------------------------------------|-------------------------|-------------------|-------------------|--------------------|------------|
| K261    | Hs, Pt, Ec, Oa                                                   | $\alpha 0$                       | S        | Ma, Tn, Tr, Pp, Ga, Dr, Ssa            | no effect               | no effect         | no effect         | n. d.              | n. d.      |
| K261    |                                                                  | $\alpha 0$                       | A        | Cae, Mam, Mm, Ca                       | no effect               | no effect         | no effect         | n. d.              | n. d.      |
| K261    |                                                                  | $\alpha 0$                       | D        | Rn                                     | no effect               | no effect         | no effect         | n. d.              | n. d.      |
| E269    | Hs, Pt, Cae, Mam, Cf, Bt, Oc, XI, Xt                             | linker ( $\alpha 0 - \beta 1$ )  | S        | Ec, Tn, Tr, Pp, Dr                     | no effect               | --                | no effect         | n. d.              | n. d.      |
| L272    | Hs, Pt, Oa, Tn, Tr                                               | $\beta 1$                        | E        | Ec, Ma, Mm, Rn, Md, Xt, Dr             | no effect               | no effect         | no effect         | n. d.              | n. d.      |
| N302    | Hs, Pt, Md, Gg, Xt                                               | linker ( $\beta 3 - \alpha C$ )  | S        | Cae, Mam, Cf, Bt, Oc, Ma, XI           | no effect               | no effect         | no effect         | n. d.              | n. d.      |
| K360    | Hs, Pt, Cae, Mam, Md, Tn, Tr, Pp, Ga, Dr                         | $\beta 5$                        | E        | Ma, XI, Xt, Ol,                        | no effect               | no effect         | no effect         | n. d.              | n. d.      |
| E375    | Hs, Pt, Cae, Mam, Cf, Ec, Ss, Ma, Mm, Gg, XI                     | $\alpha D$                       | K        | Xt, Tn, Ol, Ga, Ssa                    | ----                    | ---               | +++               | no effect          | no effect  |
| E375    |                                                                  |                                  | Q        | Rn                                     | ----                    | -                 | ++                | no effect          | no effect  |
| I378    | all but Mam, Ma, Mm, Rn                                          | $\alpha D$                       | M        | Ma, Mm                                 | ---                     | -                 | no effect         | no effect          | no effect  |
| E379    | Hs, Pt, Cae, Bt, Oc, Rn, Gg, Tn                                  | $\alpha D$                       | R        | Mm, Xt, Tr, Ca                         | ---                     | ---               | +++               | no effect          | no effect  |
| R382    | Hs, Pt, Cf, Ec, Bt, Ss, Md, Oa                                   | $\alpha D$                       | N        | Mm, Rn, XI, Xt, Tr, Ol, Pp, Dr, Dr, Ca | ----                    | ----              | no effect         | no effect          | no effect  |
| K385    | Hs, Pt, Cae, Bt, Oc, Ma, Mm, XI, Xt                              | linker ( $\alpha D - \alpha E$ ) | E        | Mam, Cf, Ec, Ss, Oa, Xt                | no effect               | no effect         | no effect         | n. d.              | n. d.      |
| V389    | Hs, Pt, Cae, Xt, Ca                                              | $\alpha E$                       | Q        | Ec, Tn, Tr                             | ---                     | ---               | no effect         | no effect          | no effect  |
| S448    | Hs, Pt                                                           | activation loop                  | N        | Cae, Mam, Cf, Ec, Oc, Ma, Md, Gg       | no effect               | ---               | no effect         | n. d.              | n. d.      |
| S448    |                                                                  |                                  | R        | Ss, Pp, Dr, Dr, Ca                     | +                       | ++                | ++++              | no effect          | no effect  |
| K449    | Hs, Pt, Cf, Bt, Ss, Oc, Oa, Tn, Dr, Dr, Ssa                      | activation loop                  | T        | Cae, Mam, Ma, Mm, Rn, Xt, Ol, Pp, Dr   | no effect               | no effect         | no effect         | n. d.              | n. d.      |
| H483    | Hs, Pt, Cae, Bt, Ss, Oc, Ma, Mm, Rn, Oa, Tn                      | linker ( $\alpha F - \alpha G$ ) | Y        | Mam, Cf, Ec, Md, XI, Xt, Pp            | no effect               | ++                | +++               | no effect          | no effect  |
| D486    | Hs, Pt, Cae, Mam                                                 | linker ( $\alpha F - \alpha G$ ) | N        | Pp                                     | +                       | ++                | ++                | no effect          | no effect  |
| D486    |                                                                  |                                  | P        | Cf, Ec, Md                             | -                       | no effect         | no effect         | no effect          | no effect  |
| A488    | Hs, Pt, Cae, Mam, Ec, Oa, Pp                                     | $\alpha G$                       | E        | Mm, Xt                                 | +++                     | ++++              | no effect         | no effect          | no effect  |
| K493    | Hs, Pt, Cae, Cf, Bt, Ss, Oc, Ma, Mm, Oa, Gg, Tn, Tr, Pp, Dr, Ssa | $\alpha G$                       | E        | Ec, Rn, XI, Xt, Tr, Dr, Ca             | no effect               | ---               | no effect         | n. d.              | n. d.      |
| K493    |                                                                  |                                  | Q        | Mam, Ol                                | no effect               | --                | no effect         | n. d.              | n. d.      |
| D500    | Hs, Pt, Cae, Mam, Ma                                             | $\alpha G$                       | N        | Bt, Rn, Md, XI, Xt, Tn, Pp, Dr, Ca     | no effect               | no effect         | ---               | no effect          | no effect  |
| D500    |                                                                  |                                  | R        | Oc, Tn, Ol                             | no effect               | no effect         | no effect         | n. d.              | n. d.      |
| D505    | Hs, Pt, Cae, Mam, Cf, Bt, Ss, Oc, Ma, Rn                         | linker ( $\alpha F - \alpha G$ ) | N        | Ec, Mm                                 | no effect               | no effect         | no effect         | n. d.              | n. d.      |

**Supplementary Table 4. Summary of mutations in human PKR and yeast growth test assays.** The indicated human PKR residues (which are conserved in the listed species and located as annotated in Dar et al. (2005)) were mutated to the indicated amino acids. The mutations were selected based on the presence of the alternate residue in the indicated species. Abbreviations for species are as listed in the legend for **Supplementary Figure 2**. Plasmids expressing WT or the indicated human PKR mutants under the control of a galactose-inducible promoter were introduced into strains expressing vacK3L-H47R, varC3L, varE3L, non-phosphorylatable eIF2 $\alpha$ -S51A, or the eIF2B $\alpha$ -E44D mutant (*gcn3-102* allele). Transformants were streaked for single colonies on galactose medium to induce PKR and K3L (or C3L or E3L) expression and incubated at 30°C. The growth of colonies was evaluated and is indicated: (-) to (----) for poor growth of yeast relative to transformants expressing WT PKR indicating weak to strong resistance, and (+) to (++++) for better growth than yeast expressing WT PKR indicating weakly to strongly increased sensitivity to vacK3L-H47R, varC3L or varE3L. n.d.= not determined.

|                                   | <b>1</b> | <b>2</b> | <b>3</b> | <b>4</b> | <b>5</b> | <b>6</b> | <b>7</b> | <b>8</b> | <b>9</b> | <b>10</b> | <b>11</b> | <b>12</b> | <b>13</b> | <b>14</b> | <b>15</b> | <b>16</b> | <b>17</b> | <b>18</b> |
|-----------------------------------|----------|----------|----------|----------|----------|----------|----------|----------|----------|-----------|-----------|-----------|-----------|-----------|-----------|-----------|-----------|-----------|
| <b>1</b> Vaccinia virus           | ***      | 79.8     | 87.6     | 98.9     | 100      | 96.6     | 88.8     | 98.9     | 37.1     | 36        | 25.8      | 22.5      | 32.6      | 33.7      | 33.7      | 39.3      | 39.3      |           |
| <b>2</b> Variola virus            |          | ***      | 90.9     | 81.8     | 80.7     | 81.8     | 92       | 79.5     | 33       | 31.8      | 33        | 25        | 21.6      | 37.5      | 36.4      | 36.4      | 35.2      | 39.8      |
| <b>3</b> Camelpox virus           |          |          | ***      | 88.8     | 87.6     | 88.8     | 98.9     | 86.5     | 33.7     | 32.6      | 33.7      | 22.5      | 20.2      | 34.8      | 33.7      | 33.7      | 37.1      | 38.2      |
| <b>4</b> Cowpox virus             |          |          |          | ***      | 98.9     | 97.8     | 89.9     | 97.8     | 36       | 34.8      | 36        | 24.7      | 22.5      | 32.6      | 32.6      | 32.6      | 39.3      | 38.2      |
| <b>5</b> Rabbitpox virus          |          |          |          |          | ***      | 96.6     | 88.8     | 98.9     | 37.1     | 36        | 36        | 25.8      | 22.5      | 32.6      | 33.7      | 33.7      | 39.3      | 39.3      |
| <b>6</b> Horsepox virus           |          |          |          |          |          | ***      | 89.9     | 97.8     | 36       | 34.8      | 36        | 24.7      | 22.5      | 33.7      | 33.7      | 33.7      | 39.3      | 39.3      |
| <b>7</b> Taterapox virus          |          |          |          |          |          |          | ***      | 87.6     | 33.7     | 32.6      | 33.7      | 22.5      | 20.2      | 36        | 34.8      | 34.8      | 37.1      | 39.3      |
| <b>8</b> Cantagalo orthopoxvirus  |          |          |          |          |          |          |          | ***      | 37.1     | 36        | 36        | 25.8      | 22.5      | 32.6      | 33.7      | 33.7      | 39.3      | 39.3      |
| <b>9</b> Lumpy skin disease virus |          |          |          |          |          |          |          |          | ***      | 96.7      | 96.7      | 26.7      | 24.4      | 35.6      | 43.3      | 43.3      | 46.7      | 53.3      |
| <b>10</b> Goatpox virus           |          |          |          |          |          |          |          |          |          | ***       | 93.3      | 26.7      | 24.4      | 34.4      | 42.2      | 42.2      | 44.4      | 51.1      |
| <b>11</b> Sheeppox virus          |          |          |          |          |          |          |          |          |          |           | ***       | 25.6      | 25.6      | 35.6      | 42.2      | 42.2      | 47.8      | 52.2      |
| <b>12</b> Myxoma virus            |          |          |          |          |          |          |          |          |          |           |           | ***       | 54.4      | 22.3      | 27.2      | 27.2      | 26.2      | 26.2      |
| <b>13</b> Rabbit fibroma virus    |          |          |          |          |          |          |          |          |          |           |           |           | ***       | 27.8      | 29.1      | 29.1      | 30.4      | 27.8      |
| <b>14</b> Yaba monkey tumor virus |          |          |          |          |          |          |          |          |          |           |           |           |           | ***       | 75.3      | 75.3      | 38.2      | 46.1      |
| <b>15</b> Yaba-like disease virus |          |          |          |          |          |          |          |          |          |           |           |           |           |           | ***       | 98.9      | 42.7      | 50.6      |
| <b>16</b> Tanapox virus           |          |          |          |          |          |          |          |          |          |           |           |           |           |           |           | ***       | 42.7      | 50.6      |
| <b>17</b> Swinepox virus          |          |          |          |          |          |          |          |          |          |           |           |           |           |           |           |           | ***       | 44.8      |
| <b>18</b> Deerpox virus           |          |          |          |          |          |          |          |          |          |           |           |           |           |           |           |           |           | ***       |

**Supplementary Table 5. Similarity of K3L orthologs in poxviruses**

Similarities on the amino acid level are shown in % as obtained from a multiple alignment using Megalign.

| species (common name)                                    | gene | accession number    |
|----------------------------------------------------------|------|---------------------|
| <i>Bos taurus</i> (cattle)                               | GCN2 | XM_001787661        |
| <i>Bos taurus</i> (cattle)                               | HRI  | NM_001038053        |
| <i>Bos taurus</i> (cattle)                               | NEK2 | NM_001046270        |
| <i>Bos taurus</i> (cattle)                               | PBK  | NM_001102178        |
| <i>Bos taurus</i> (cattle)                               | PERK | NM_001098086        |
| <i>Bos taurus</i> (cattle)                               | PKR  | AB104655            |
| <i>Bos taurus</i> (cattle)                               | TTK  | XM_603264           |
| <i>Bos taurus</i> (cattle)                               | WEE1 | NM_001101205        |
| <i>Canis familiaris</i> (dog)                            | PKR  | NM_001048135        |
| <i>Carassius auratus</i> (goldfish)                      | PKZ  | AY293929            |
| <i>Chlorocebus aethiops</i> (African green monkey)       | PKR  | AY623897            |
| <i>Danio rerio</i> (zebrafish)                           | GCN2 | FM210478            |
| <i>Danio rerio</i> (zebrafish)                           | HRI  | NM_001077567        |
| <i>Danio rerio</i> (zebrafish)                           | NEK2 | NM_201050           |
| <i>Danio rerio</i> (zebrafish)                           | PBK  | NM_001002387        |
| <i>Danio rerio</i> (zebrafish)                           | PERK | XM_695386           |
| <i>Danio rerio</i> (zebrafish)                           | PKR  | AM421526            |
| <i>Danio rerio</i> (zebrafish)                           | PKZ  | AJ852018            |
| <i>Danio rerio</i> (zebrafish)                           | TTK  | NM_175042           |
| <i>Danio rerio</i> (zebrafish)                           | WEE1 | NM_001005770        |
| <i>Equus caballus</i> (horse)                            | PKR  | AY850106            |
| <i>Gallus gallus</i> (chicken)                           | GCN2 | XM_421203           |
| <i>Gallus gallus</i> (chicken)                           | HRI  | NM_204648           |
| <i>Gallus gallus</i> (chicken)                           | NEK2 | NM_001031050        |
| <i>Gallus gallus</i> (chicken)                           | PBK  | XM_420011           |
| <i>Gallus gallus</i> (chicken)                           | PERK | XM_420868           |
| <i>Gallus gallus</i> (chicken)                           | PKR  | AB125660            |
| <i>Gallus gallus</i> (chicken)                           | TTK  | XM_419867           |
| <i>Gallus gallus</i> (chicken)                           | WEE1 | NM_001031181        |
| <i>Gasterosteus aculeatus</i> (three spined stickleback) | GCN2 | ENSGACT00000008173* |
| <i>Gasterosteus aculeatus</i> (three spined stickleback) | HRI  | ENSGACT00000012570* |
| <i>Gasterosteus aculeatus</i> (three spined stickleback) | NEK2 | ENSGACG00000009916* |
| <i>Gasterosteus aculeatus</i> (three spined stickleback) | PBK  | ENSGACG00000006932* |
| <i>Gasterosteus aculeatus</i> (three spined stickleback) | PERK | ENSGACT00000005852* |
| <i>Gasterosteus aculeatus</i> (three spined stickleback) | PKR1 | AM850085            |
| <i>Gasterosteus aculeatus</i> (three spined stickleback) | TTK  | ENSGACG00000005223* |
| <i>Gasterosteus aculeatus</i> (three spined stickleback) | WEE1 | ENSGACT00000012920* |
| <i>Homo sapiens</i> (human)                              | GCN2 | NM_001013703        |
| <i>Homo sapiens</i> (human)                              | HRI  | NM_001134335        |
| <i>Homo sapiens</i> (human)                              | NEK2 | NM_002497           |
| <i>Homo sapiens</i> (human)                              | PBK  | NM_018492           |
| <i>Homo sapiens</i> (human)                              | PERK | AF193339            |
| <i>Homo sapiens</i> (human)                              | PKA  | NM_207518           |
| <i>Homo sapiens</i> (human)                              | PKR  | NM_002759           |
| <i>Homo sapiens</i> (human)                              | TTK  | NM_003318           |
| <i>Homo sapiens</i> (human)                              | WEE1 | NM_003390           |
| <i>Macaca mulatta</i> (Rhesus macaque)                   | PKR  | EF467667            |



| species (common name)                                    | gene | accession number    |
|----------------------------------------------------------|------|---------------------|
| <i>Mesocricetus auratus</i> (golden hamster)             | PKR  | DQ645944            |
| <i>Monodelphis domestica</i> (gray short-tailed opossum) | PKR  | ENSMODT00000030492* |
| <i>Mus musculus</i> (house mouse)                        | GCN2 | NM_013719           |
| <i>Mus musculus</i> (house mouse)                        | HRI  | NM_013557           |
| <i>Mus musculus</i> (house mouse)                        | NEK2 | AF007247            |
| <i>Mus musculus</i> (house mouse)                        | PBK  | NM_023209           |
| <i>Mus musculus</i> (house mouse)                        | PERK | AF076681            |
| <i>Mus musculus</i> (house mouse)                        | PKR  | NM_011163           |
| <i>Mus musculus</i> (house mouse)                        | TTK  | NM_009445           |
| <i>Mus musculus</i> (house mouse)                        | WEE1 | NM_009516           |
| <i>Oryctolagus cuniculus</i> (European rabbit)           | PKR  | DQ115394            |
| <i>Oryzias latipes</i> (Japanese medaka)                 | PKR  | AM850088            |
| <i>Pan troglodytes</i> (chimpanzee)                      | PKR  | XM_001166391        |
| <i>Pimephales promelas</i> (fathead minnow)              | PKR  | AM850089            |
| <i>Rattus norvegicus</i> (Norway rat)                    | GCN2 | XM_230462           |
| <i>Rattus norvegicus</i> (Norway rat)                    | HRI  | NM_013223           |
| <i>Rattus norvegicus</i> (Norway rat)                    | NEK2 | AF352021            |
| <i>Rattus norvegicus</i> (Norway rat)                    | PBK  | XM_224300           |
| <i>Rattus norvegicus</i> (Norway rat)                    | PERK | NM_031599           |
| <i>Rattus norvegicus</i> (Norway rat)                    | PKR  | NM_019335           |
| <i>Rattus norvegicus</i> (Norway rat)                    | TTK  | XM_236477           |
| <i>Rattus norvegicus</i> (Norway rat)                    | WEE1 | NM_001012742        |
| <i>Salmo salar</i> (Atlantic salmon)                     | PKZ  | ABA64562            |
| <i>Sus scrofa</i> (pig)                                  | PKR  | NM_214319           |
| <i>Takifugu rubripes</i> (torafugu)                      | PKR1 | AM850086            |
| <i>Takifugu rubripes</i> (torafugu)                      | PKR2 | AM850087            |
| <i>Tetraodon nigroviridis</i> (green spotted pufferfish) | PKR1 | AM421523            |
| <i>Tetraodon nigroviridis</i> (green spotted pufferfish) | PKR2 | AM421524            |
| <i>Tetraodon nigroviridis</i> (green spotted pufferfish) | PKR3 | AM421525            |
| <i>Xenopus laevis</i> (African clawed frog)              | PKR1 | AM421528            |
| <i>Xenopus tropicalis</i> (western clawed frog)          | GCN2 | FM210530            |
| <i>Xenopus tropicalis</i> (western clawed frog)          | HRI  | NM_001045573        |
| <i>Xenopus tropicalis</i> (western clawed frog)          | NEK2 | BC075559            |
| <i>Xenopus tropicalis</i> (western clawed frog)          | PBK  | NM_001011346        |
| <i>Xenopus tropicalis</i> (western clawed frog)          | PERK | FM210531            |
| <i>Xenopus tropicalis</i> (western clawed frog)          | PKR1 | AM850090            |
| <i>Xenopus tropicalis</i> (western clawed frog)          | PKR2 | AM850091            |
| <i>Xenopus tropicalis</i> (western clawed frog)          | PKR3 | AM850092            |
| <i>Xenopus tropicalis</i> (western clawed frog)          | TTK  | ENSXETG00000011768* |
| <i>Xenopus tropicalis</i> (western clawed frog)          | WEE1 | NM_001126965        |

**Supplementary Table 6. Accession numbers of genes used for phylogenetic analyses.**

\* Ensembl identification numbers are shown
